# Supplementary material for: Purification, Characterization and Evaluation of Inhibitory Mechanism of ACE Inhibitory Peptides from Pearl Oyster (Pinctada fucata martensii) Meat Protein Hydrolysate
Source: PubMed Central journal article supplement (PMC6723713; doi:10.3390/md17080463), 2019-08-08
Supplement: marinedrugs-17-00463-s001.pdf [file marinedrugs-17-00463-s001.pdf]

Supplementary Materials:

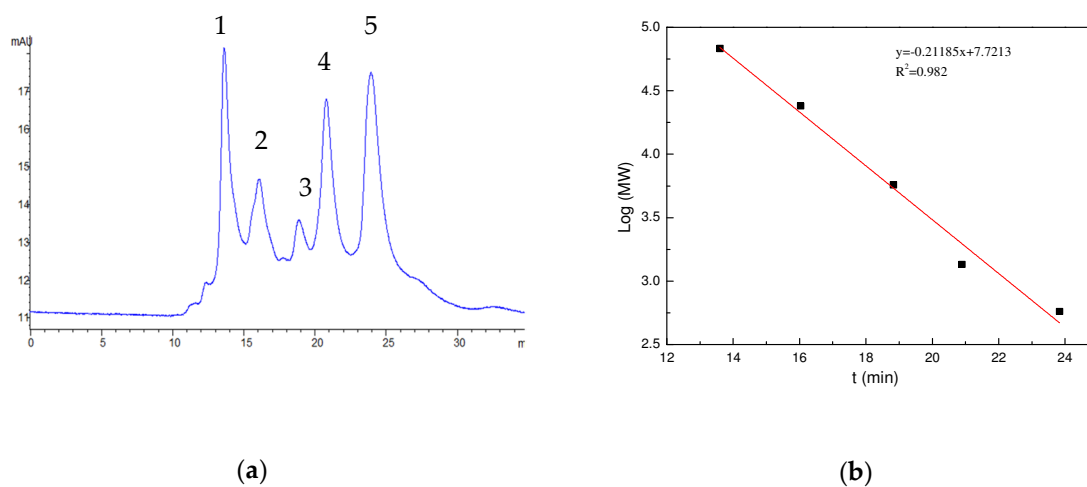

**Figure S1.** GPC chromatograms of standard materials (a) and standard curve (b) obtained from standard materials: (1) BSA (66 kDa), (2) trypsin inhibitor (24 kDa), (3) human insulin (5808 Da), (4) vitamin B<sub>12</sub> (1355 Da), and (5) FFVAP (577.92 Da).
